# Supplementary material
Source: MDPI journal article supplement (https://www.mdpi.com/2073-4441/12/6/1681)
Supplement: s1 [file s1]

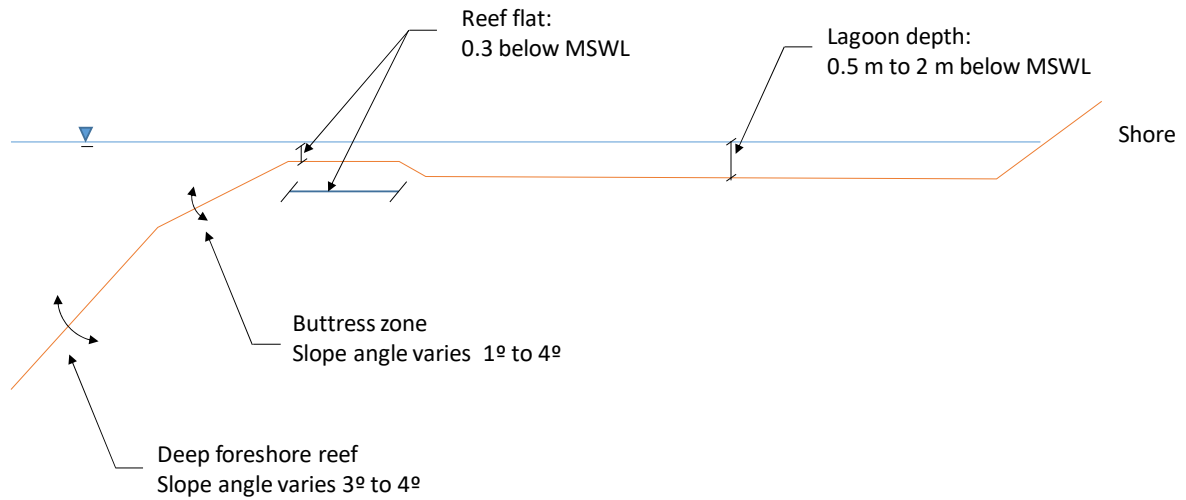

**Figure S1.** Cross-shore section of the reef representing the typical depths of the nearshore in Flic-en-Flac.

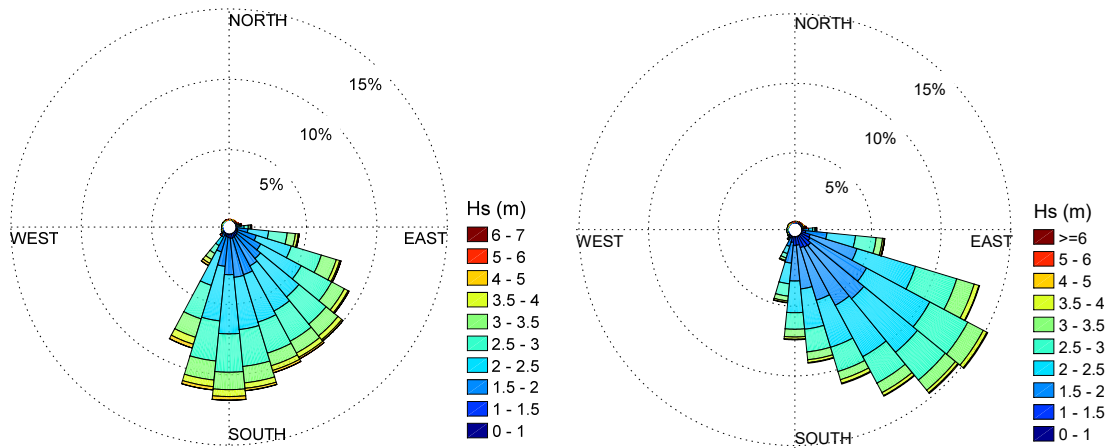

**Figure S2.** Mean wave roses at node 1 (left) and node 2 (right) based on 39 years of Era Interim data.

**Table S1.** List of the wave conditions (including wave height, period and direction) considered in the mean climate analysis. Significant wave heights (Hs) are in meters and peak periods (Tp) in seconds. SbE means south by east and it is the standard nomenclature when 32-wave compass roses are used.

| Direction |    |      |    |         |    |        |    |         |    |      |    |         |    |        |    |
|-----------|----|------|----|---------|----|--------|----|---------|----|------|----|---------|----|--------|----|
| SbE       |    | S    |    | SbW     |    | SSW    |    | SWbS    |    | SW   |    | SWbW    |    | WSW    |    |
| 168.75°   |    | 180° |    | 191.25° |    | 202.5° |    | 213.75° |    | 225° |    | 236.25° |    | 247.5° |    |
| Hs        | Tp | Hs   | Tp | Hs      | Tp | Hs     | Tp | Hs      | Tp | Hs   | Tp | Hs      | Tp | Hs     | Tp |
| 1.5       | 7  | 1.5  | 9  | 1.5     | 9  | 1.5    | 9  | 1.5     | 9  | 1.5  | 9  | 1.5     | 9  | 2.5    | 9  |
| 2.5       | 7  | 2.5  | 9  | 2.5     | 9  | 2.5    | 9  | 2.5     | 9  | 2.5  | 9  | 2.5     | 9  |        |    |
| 1.5       | 9  | 3.5  | 9  | 3.5     | 9  | 3.5    | 9  | 3.5     | 9  | 2.5  | 11 |         |    |        |    |
| 2.5       | 9  | 4.5  | 9  | 1.5     | 11 | 1.5    | 11 | 1.5     | 11 | 3.5  | 11 |         |    |        |    |
| 3.5       | 9  | 1.5  | 11 | 2.5     | 11 | 2.5    | 11 | 2.5     | 11 | 2.5  | 13 |         |    |        |    |
| 4.5       | 9  | 2.5  | 11 | 3.5     | 11 | 3.5    | 11 | 3.5     | 11 |      |    |         |    |        |    |
| 1.5       | 11 | 3.5  | 11 | 4.5     | 11 | 4.5    | 11 | 4.5     | 11 |      |    |         |    |        |    |
| 2.5       | 11 | 4.5  | 11 | 2.5     | 13 | 2.5    | 13 | 2.5     | 13 |      |    |         |    |        |    |
| 3.5       | 11 | 2.5  | 13 | 3.5     | 13 | 3.5    | 13 | 3.5     | 13 |      |    |         |    |        |    |

|     |    |     |    |     |    |     |    |     |    |
|-----|----|-----|----|-----|----|-----|----|-----|----|
| 4.5 | 11 | 3.5 | 13 | 4.5 | 13 | 4.5 | 13 | 4.5 | 13 |
| 2.5 | 13 | 4.5 | 13 | 3.5 | 15 |     |    |     |    |
| 3.5 | 13 | 4.5 | 15 |     |    |     |    |     |    |
| 4.5 | 13 |     |    |     |    |     |    |     |    |

---

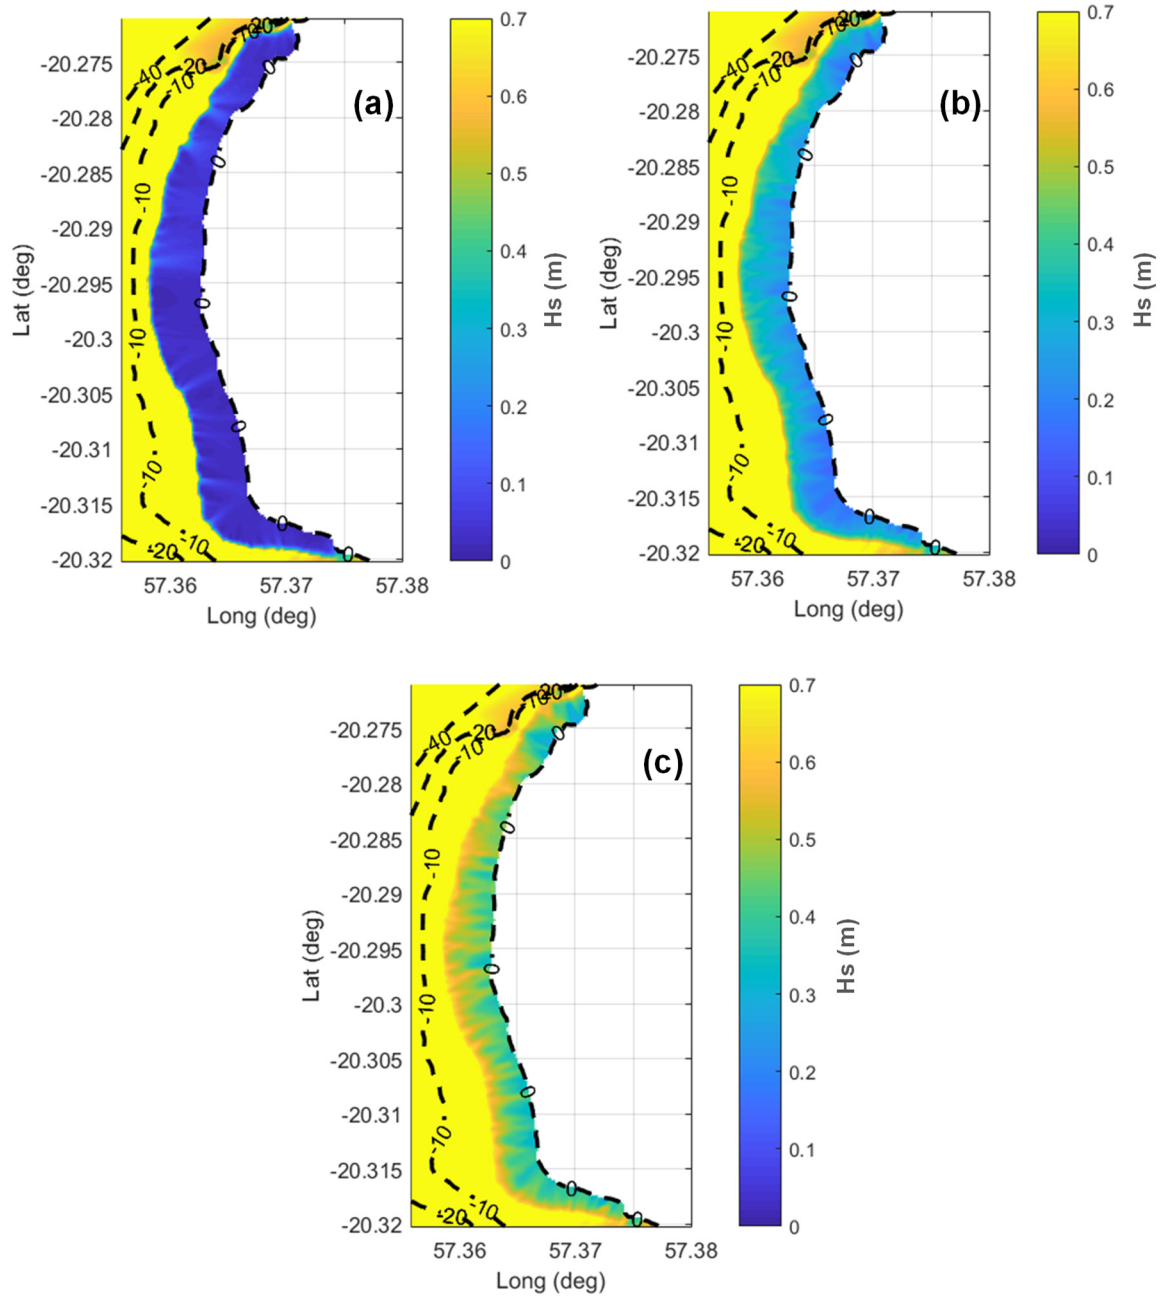

**Figure S3.** Map of significant wave heights (Hs) for mean wave climate. The colored areas are the wave fields whereas the discontinuous black lines are the isobaths. Units in meters. (a): Scenario 4. (b): Scenario 5. (c): Scenario 6.
